# Supplementary material
Source: MDPI journal article supplement (https://www.mdpi.com/2073-4441/14/14/2201)
Supplement: s1 [file s1]

# Adsorption of tannic acid and macromolecular humic/fulvic acid onto polystyrene microplastics: A comparison study

Junsuo Li, Shoucheng Ma, Xinying Li and Wei Wei \*

## 1. Properties of DOMs

The selected physicochemical properties of HA, FA, and TA used in this study are presented in Table S1 [21].

**Table S1.** Selected physicochemical properties of model DOMs.

| DOM | Elemental compositions (wt%) |     |     |      | Molecular weight (kDa) | Average molecular size (nm) |
|-----|------------------------------|-----|-----|------|------------------------|-----------------------------|
|     | C                            | H   | N   | O    |                        |                             |
| HA  | 54.8                         | 4.8 | 0.9 | 39.5 | 22.8                   | 185-280                     |
| FA  | 45.2                         | 3.9 | 1.3 | 49.6 | 3.6                    | 30-75                       |
| TA  | 53.6                         | 3.1 | -   | 43.3 | 1.701                  | ~2.5                        |

## 2. Adsorption kinetics

In order to study the adsorption mechanism of PS MPs on DOM, the pseudo-first-order model (1) [35], pseudo-second-order model (2) [36], and Elovich model (3) [37] were used to describe the kinetic adsorption model. The kinetic model is expressed as follows:

$$q_t = q_e(1 - \exp(-k_1 t)) \quad (1)$$

$$q_t = \frac{q_e^2 k_2 t}{1 + q_e k_2 t} \quad (2)$$

$$q_t = \frac{1}{\beta} \ln(\alpha\beta) + \frac{1}{\beta} \ln t \quad (3)$$

where  $k_1$  (1/min) and  $k_2$  (g/(μg·min)) are the adsorption rate constants of the pseudo-first-order and pseudo-second-order models, respectively.  $q_t$  (μg/g) is the adsorption amount at time  $t$ ,  $q_e$  (μg/g) is the adsorption amount per unit adsorbent at equilibrium;  $\alpha$  (g/μg) is the initial adsorption rate constant,  $\beta$  (μg/(g·min)) is related to the surface coverage of the adsorbent and the activation energy of the chemical adsorption.

## 3. Adsorption isotherms

In this study, Langmuir model (5) [38], Freundlich model (6) [39], and Sips model (7) [40] were used to study the adsorption process of PS MPs on DOM. The isothermal adsorption model is as follows:

$$q_e = \frac{q_m K_L C_e}{1 + K_L C_e} \quad (4)$$

$$q_e = K_f C_e^{1/n} \quad (5)$$

$$q_e = q_m \frac{(K_s C_e)^{1/n}}{1 + (K_s C_e)^{1/n}} \quad (6)$$

where,  $q_e$  (μg/g) is the equilibrium adsorption amount;  $C_e$  (μg/L) is the equilibrium concentration of solution adsorbent;  $q_m$  (μg/g) is the maximum adsorption capacity;  $K_L$  (L/μg) is Langmuir adsorption constant;  $K_f$  (L/g) is the Freundlich distribution coefficient;  $K_s$

---

$(L/\mu\text{g})$  is Sips equilibrium constant; and  $1/n$  is the heterogeneous parameter of the material. The closer  $n$  value is to 1, the more homogeneous the material surface is.
